# Supplementary material
Source: publisher site journal article supplement (https://www.dovepress.com/article/322432)
Supplement: Supplementary file 1 [file get_supplementary_file.php]

Table 1. ICD-9-CM Codes Used for Chronic Pain Disorders and Suicide Attempt Identification

| **Pain Type** | **ICD-9-CM** |
| --- | --- |
| **Headache** | 339.xx, 346.xx, 784.0, 307.81, 350.xx |
| **Neck Pain** | 721.0, 722.0, 722.71, 722.81, 722.91, 723.xx, 805.0, 805.1, 839.0, 839.1, 847.0 |
| **Back Pain** | 720.xx, 721.3, 721.4, 721.5, 721.6, 721.7, 721.8, 721.9, 722.1, 722.2, 722.3, 722.5, 722.70, 722.72, 722.73, 722.80, 722.82, 722.83, 722.90, 722.92, 722.93, 724, 847.4, 847.2, 847.3, 847.9, 805.2, 805.3, 805.4, 805.5, 805.6, 805.7, 805.8, 805.9, 839.5, 839.42, 737.1, 737.3, 738.4, 738.5, 739.2, 739.3, 739.4, 756.1 |
| **Other Pain** | 337.2, 715.15, 715.16, 715.92, 715.93, 715.95, 715.98, 719.42, 719.43, 719.44, 719.47, 724.1, 729.1, 714.XX, 716.9 |
| **TBI** | 800.xx, 801.xx, 802.xx, 803.xx, 804.xx, 850.xx, 853.xx, 854.xx |
| **Suicide Attempt** | E950.xx, E951.xx, E952.xx, E953.xx, E954.xx, E955.xx, E956.xx, E957.xx, E958.xx, E959.xx |
